# Supplementary material
Source: ML conference proceedings conference paper supplement (https://openreview.net/forum?id=BcIfJuIscx5)

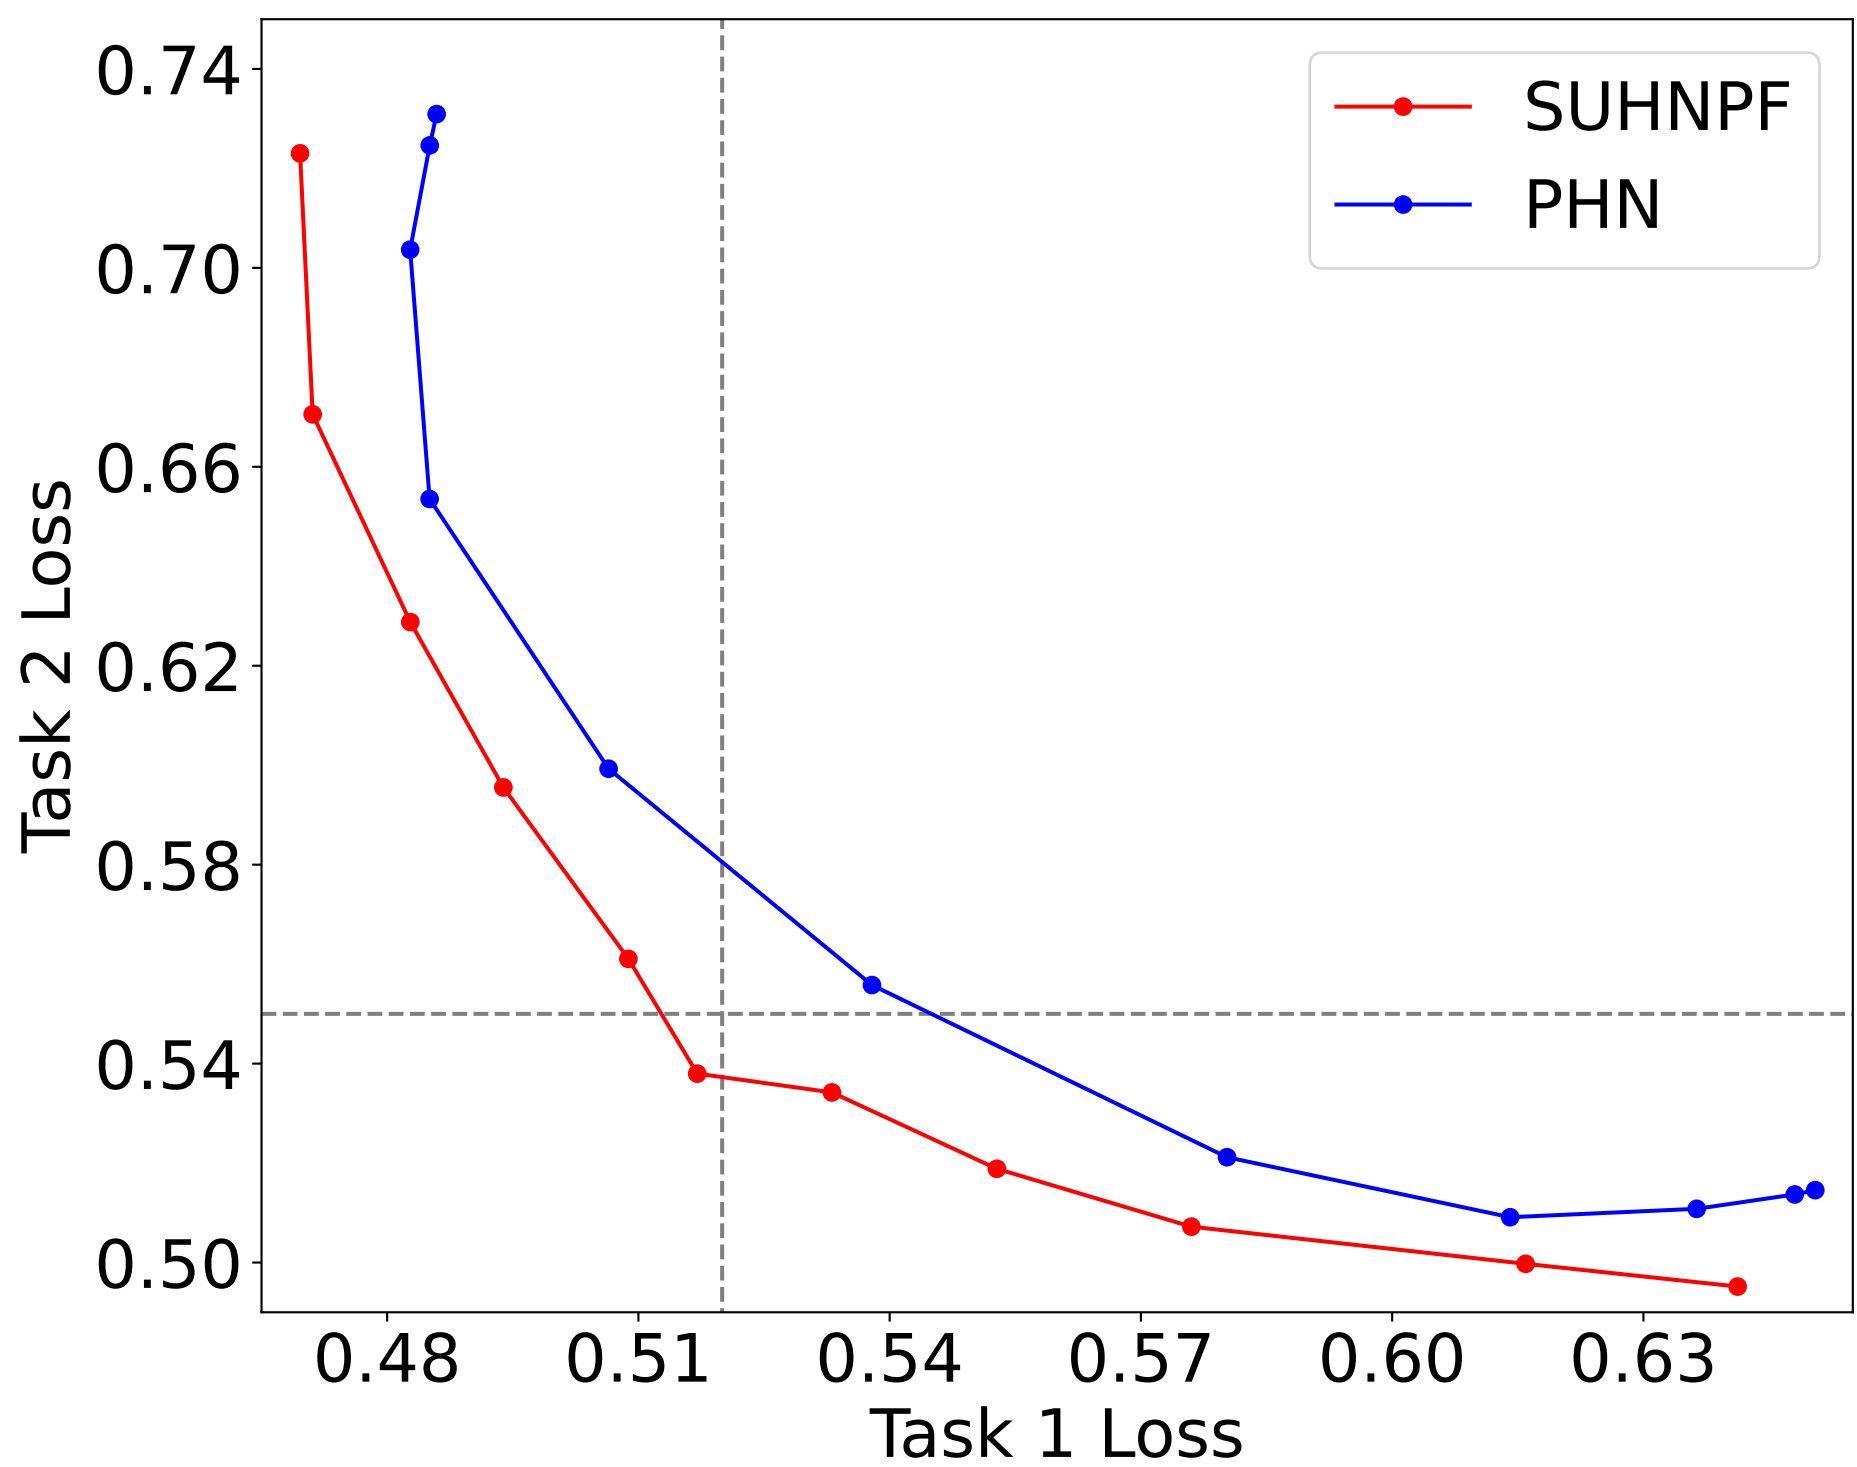

Supplement: supplementary_material [file attachment]

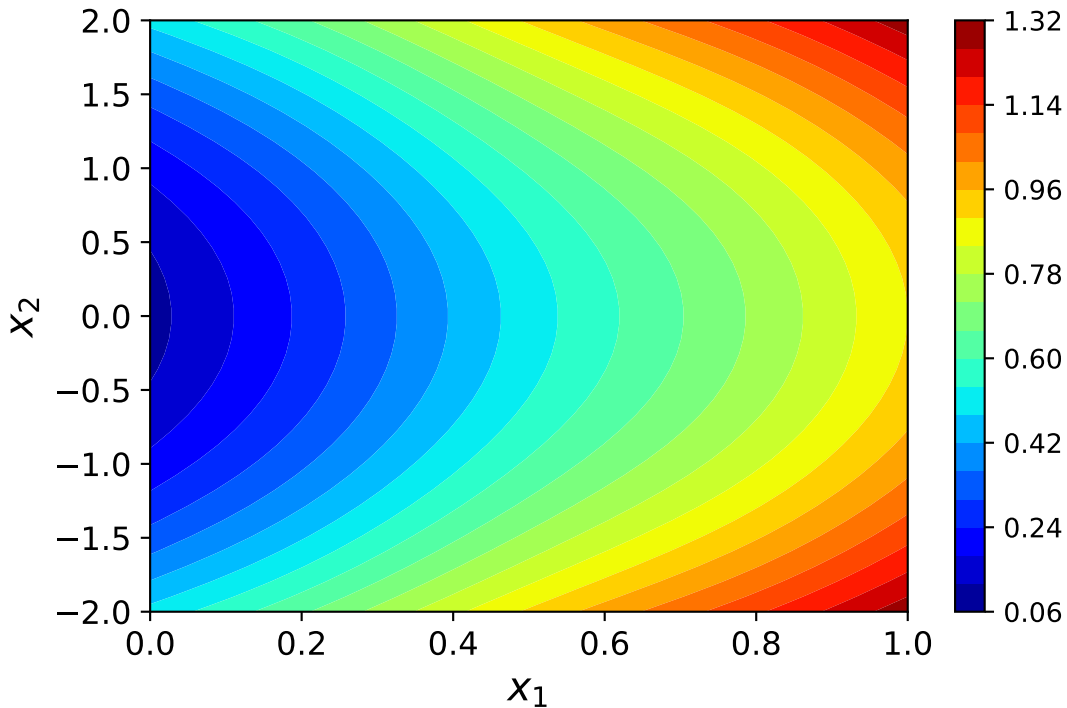

Supplement: supplementary_material [file attachment]

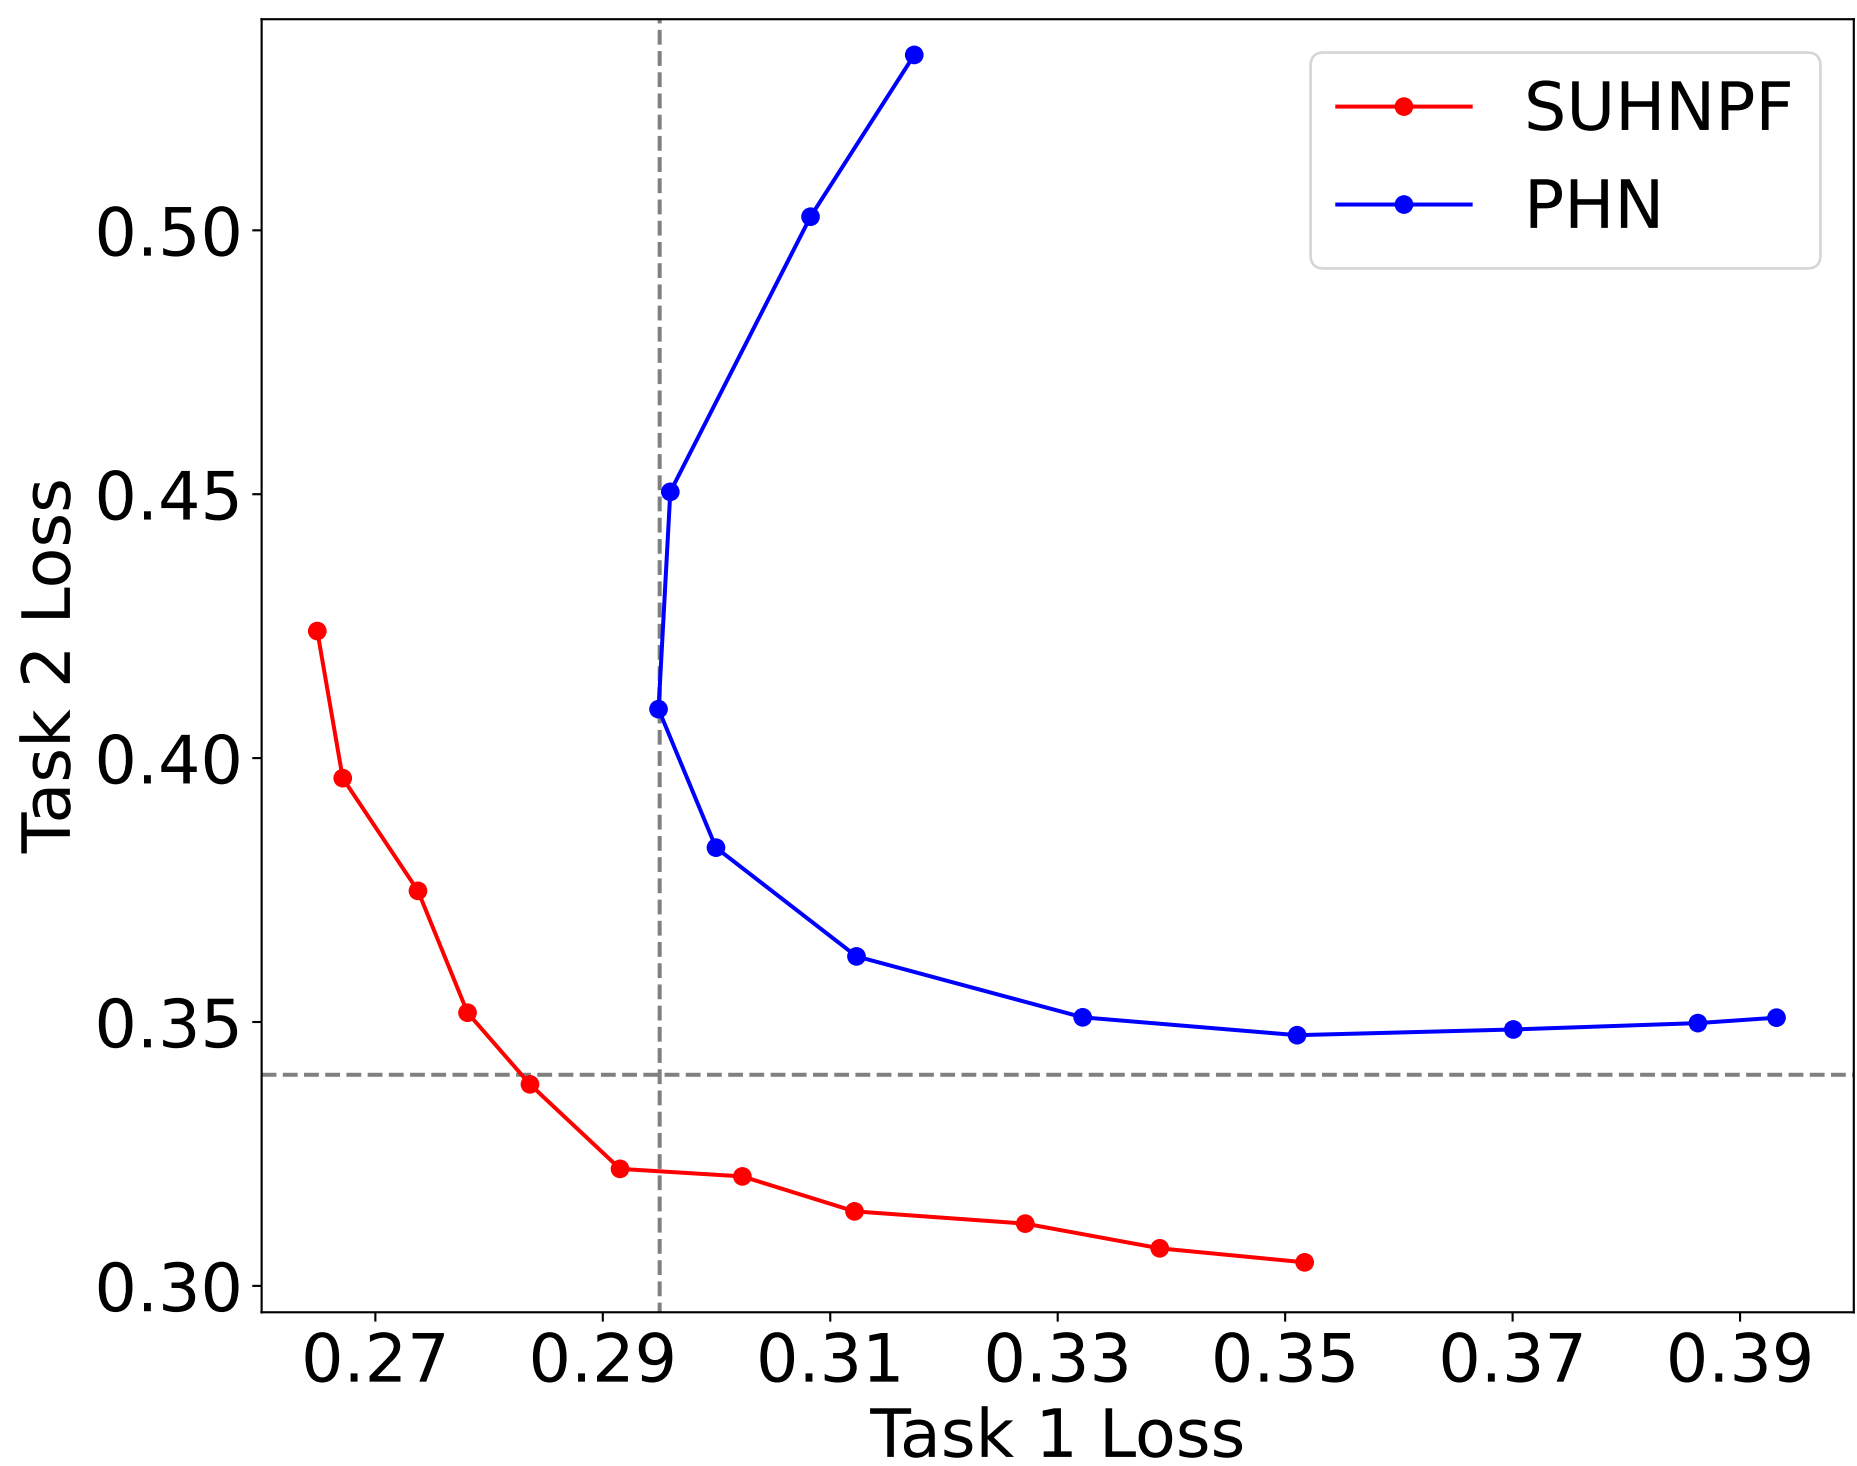

Supplement: supplementary_material [file attachment]

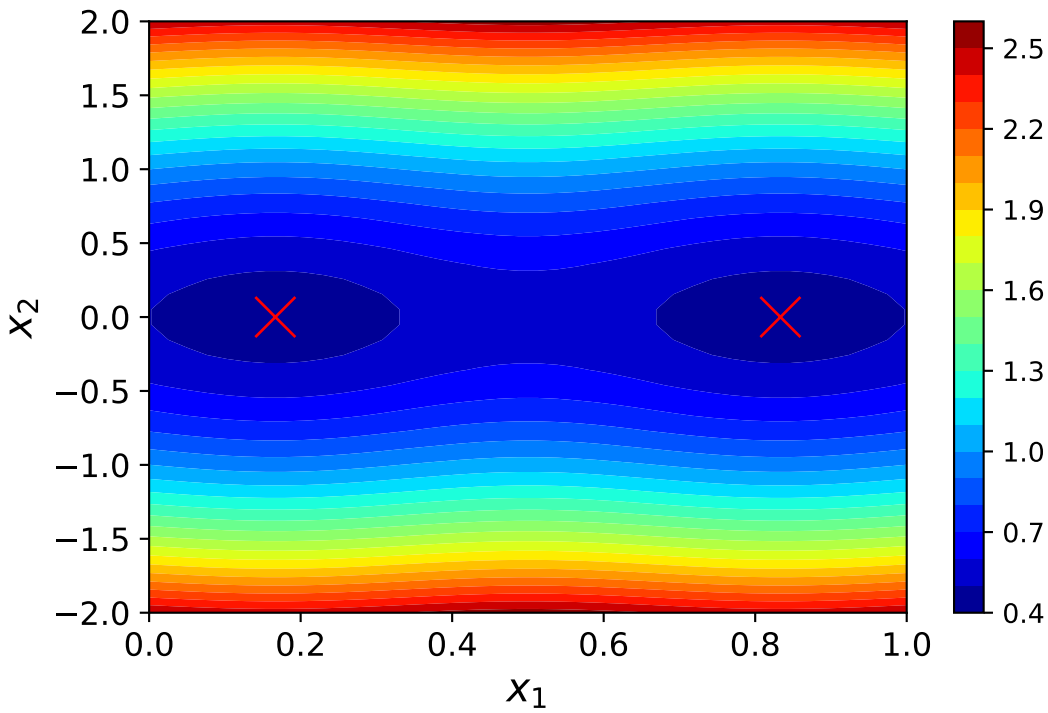

Supplement: supplementary_material [file attachment]

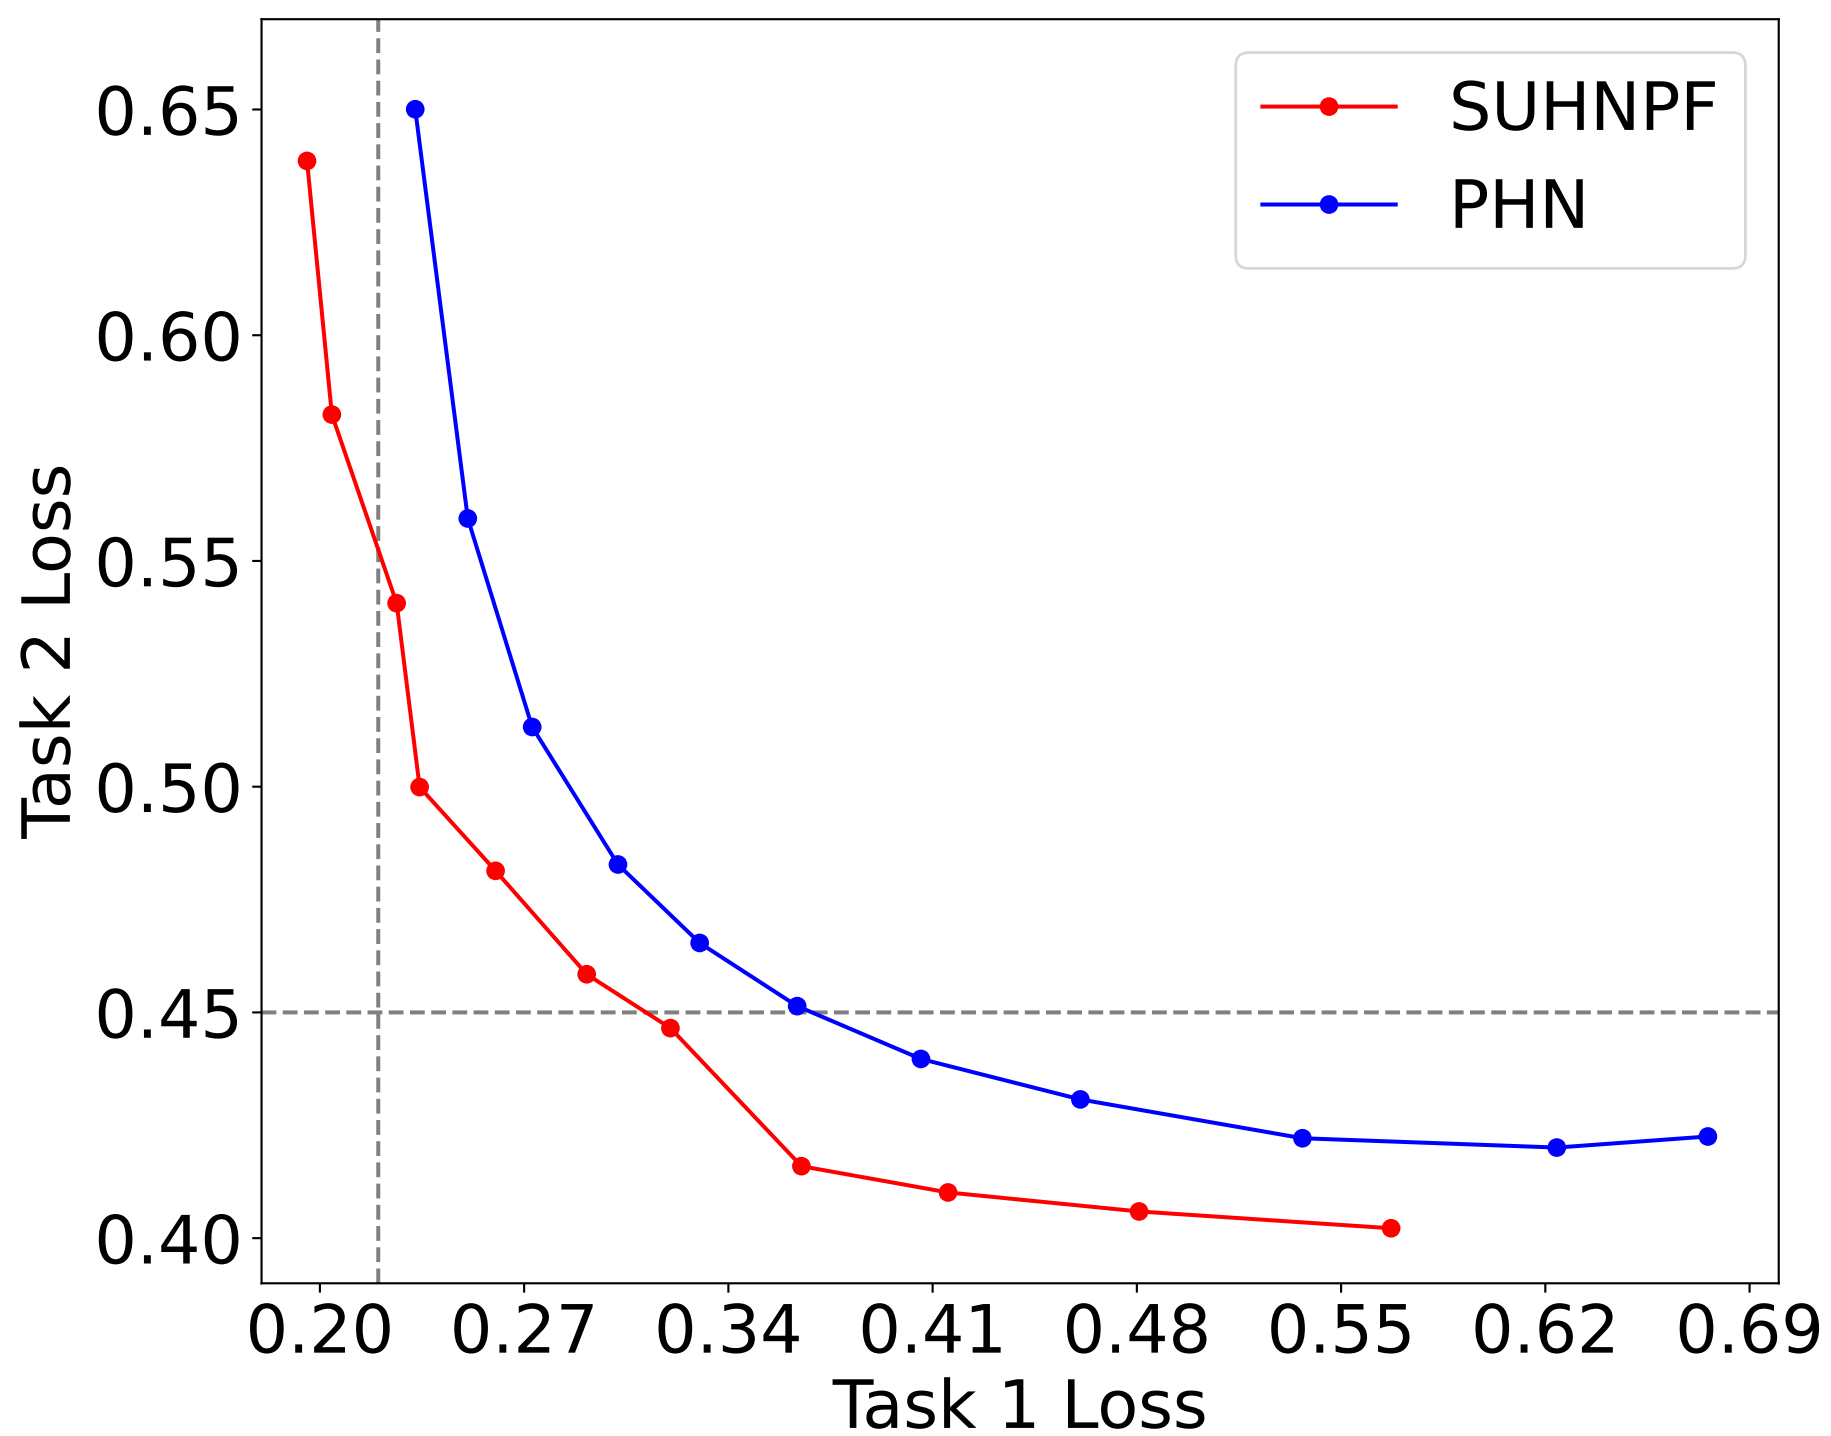

Supplement: supplementary_material [file attachment]

Binary Cross Entropy

$10^{-1}$   
 $10^{-2}$   
 $10^{-3}$   
 $10^{-4}$

Training Loss

Mean Square Error  
 $10^{-2}$   
 $10^{-3}$   
 $10^{-4}$   
 $10^{-5}$   
 $10^{-6}$   
 $10^{-7}$

0

2

4

6

8

No. epoch

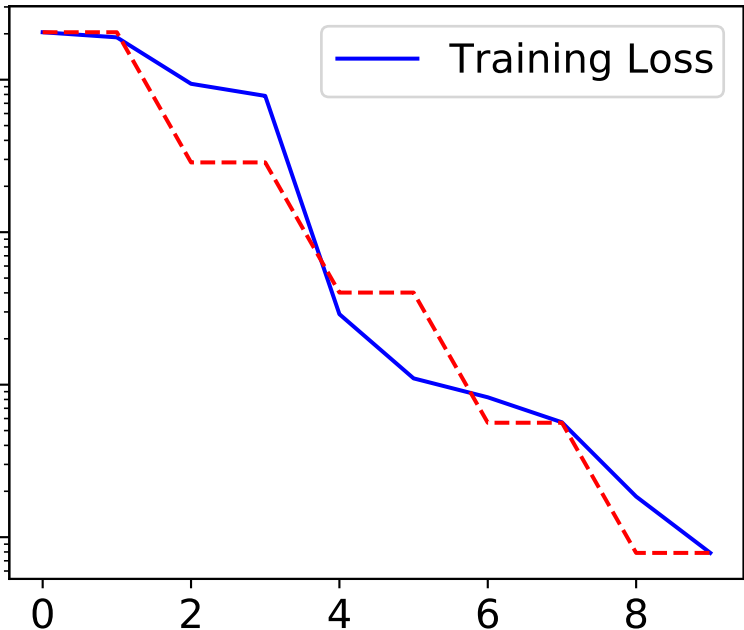

Supplement: supplementary_material [file attachment]

Binary Cross Entropy

Training Loss

Mean Square Error

$10^{-1}$   
 $10^{-2}$   
 $10^{-3}$   
 $10^{-4}$

$10^{-1}$   
 $10^{-3}$   
 $10^{-5}$

0

2

4

6

8

No. epoch

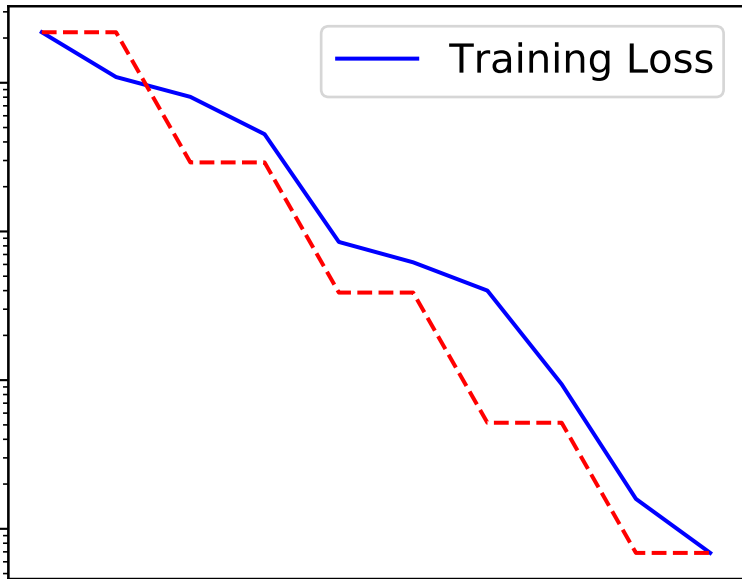

Supplement: supplementary_material [file attachment]

Binary Cross Entropy

Training Loss

Mean Square Error

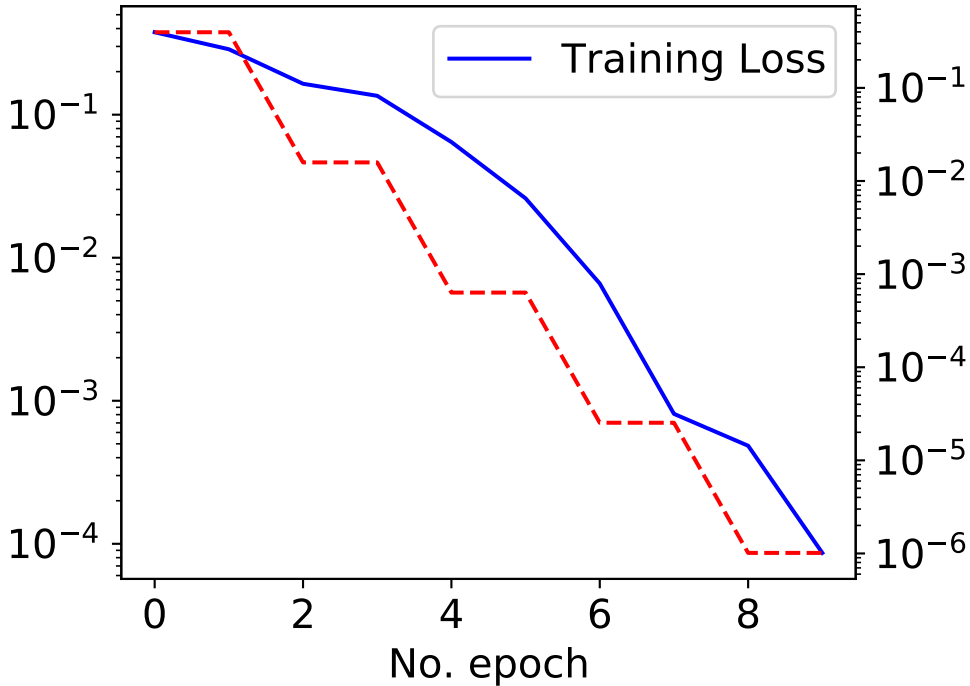

Supplement: supplementary_material [file attachment]

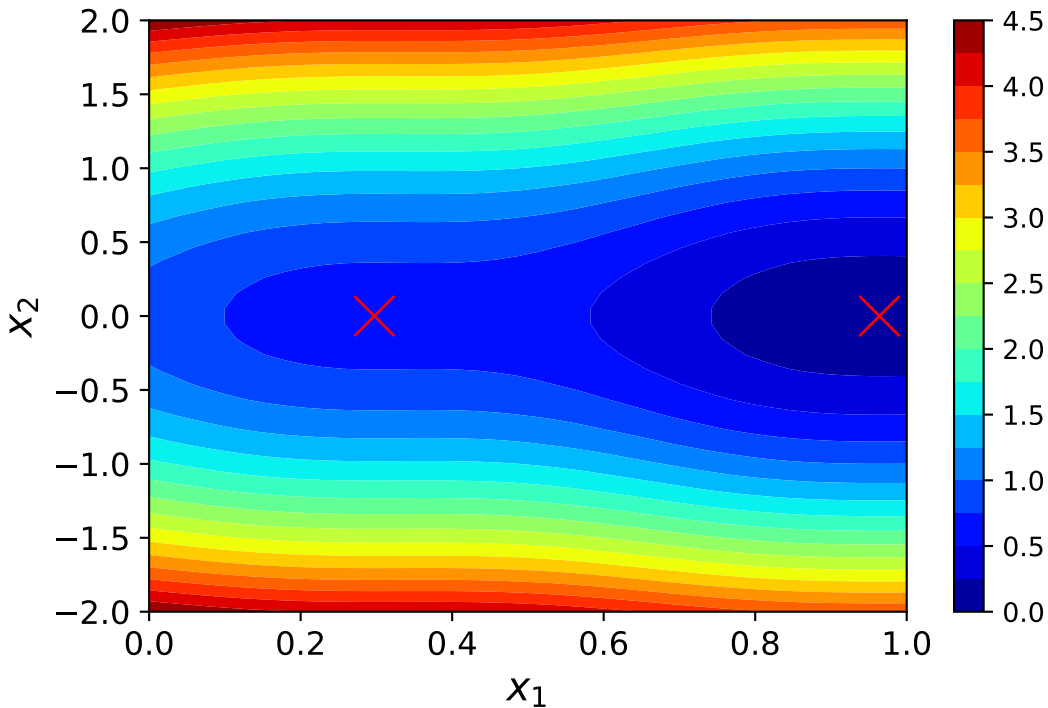

Supplement: supplementary_material [file attachment]

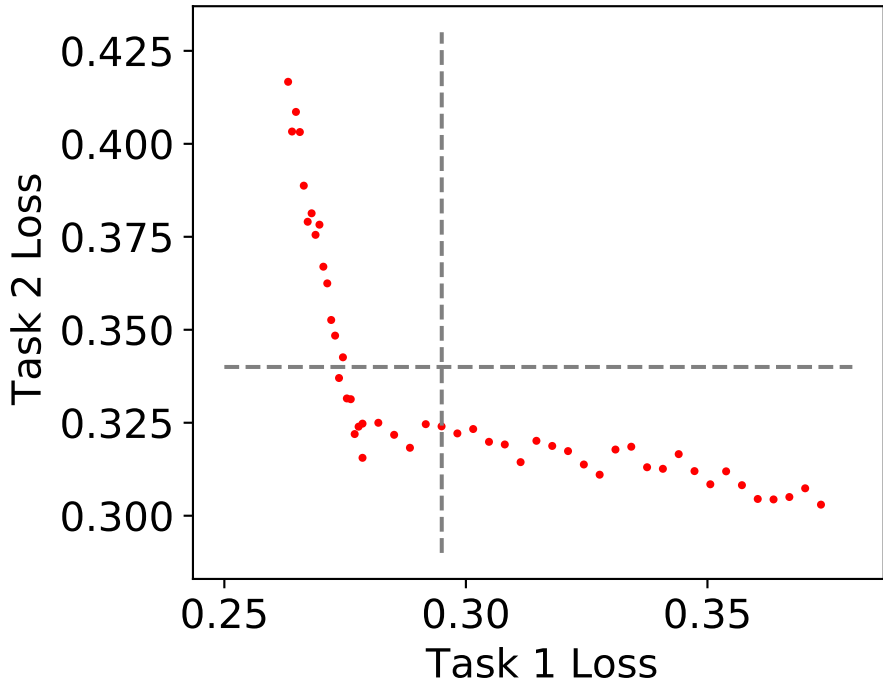

Supplement: supplementary_material [file attachment]

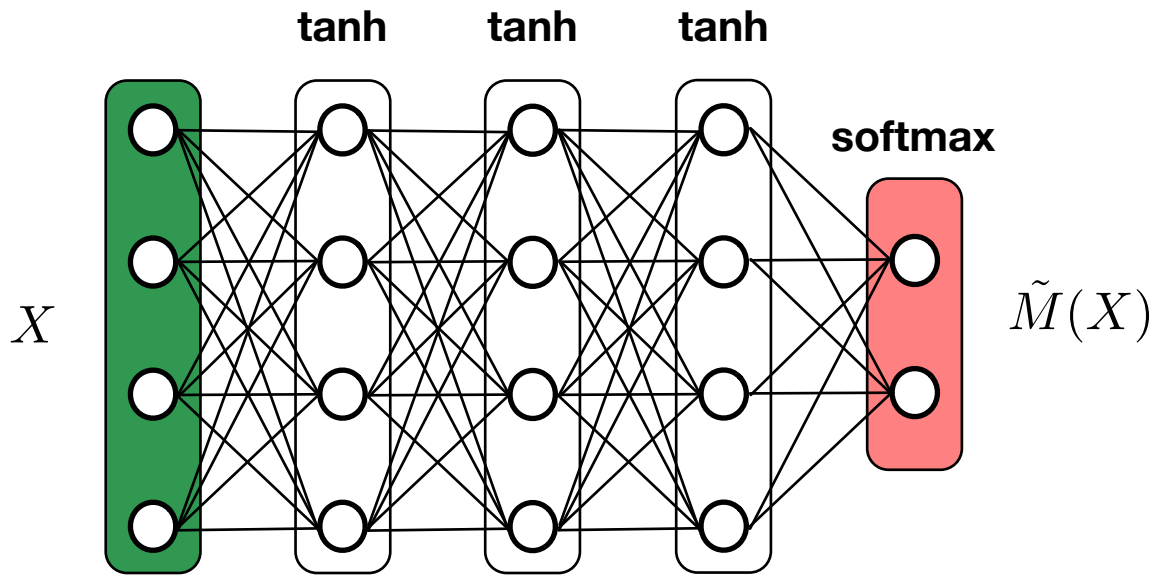

$$\text{Loss} = \text{Binary Cross Entropy} \left( \det \left( L(X)^T L(X) \right), \tilde{M}(X) \right)$$

Supplement: supplementary_material [file attachment]

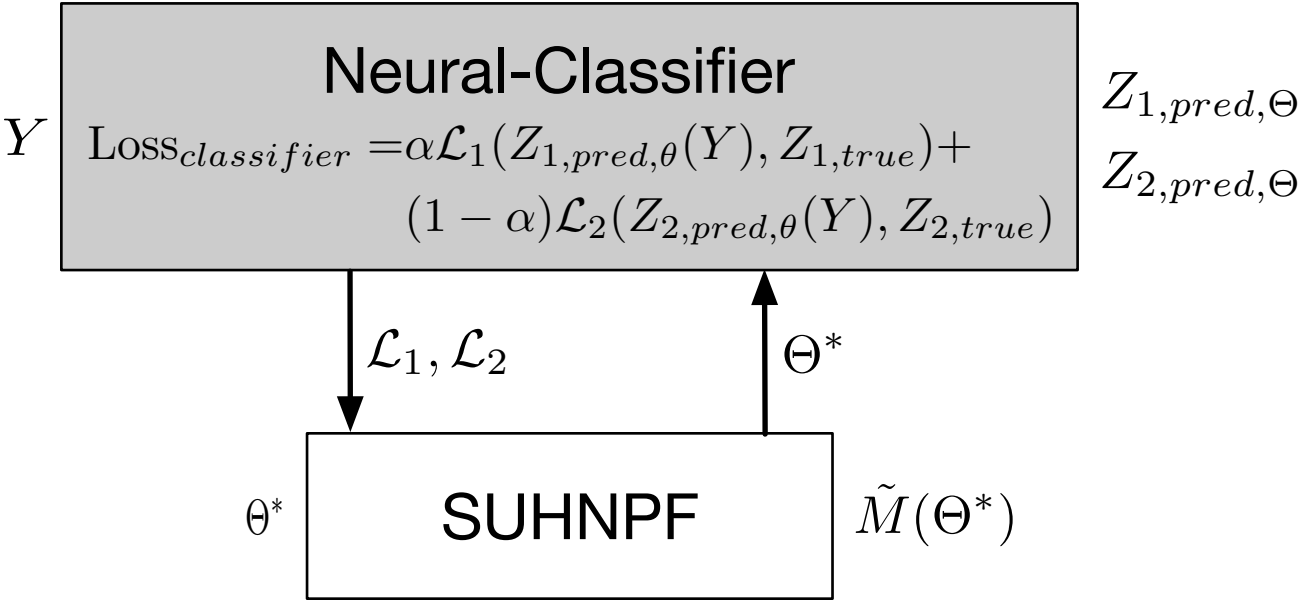

Supplement: supplementary_material [file attachment]

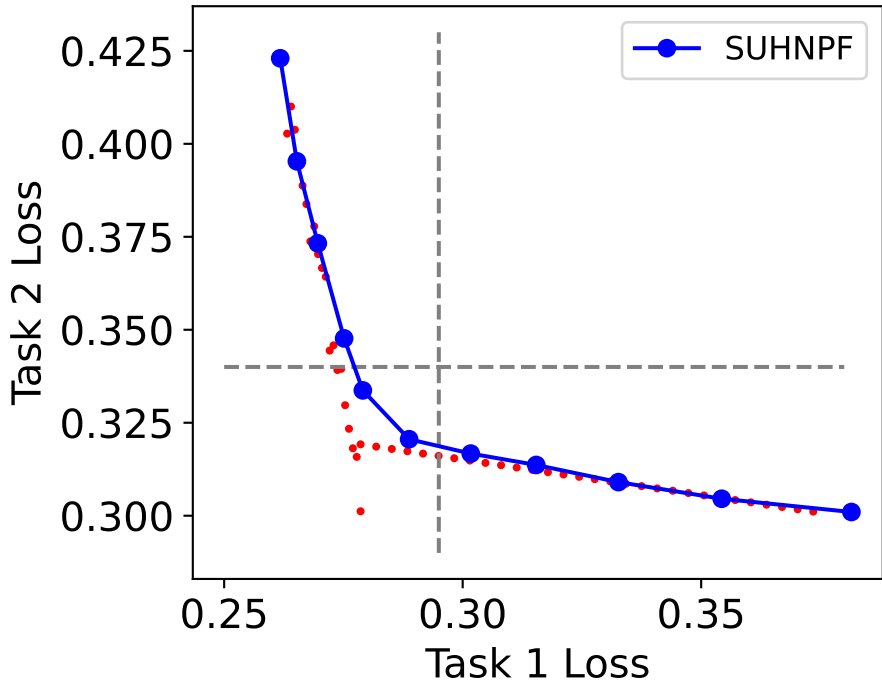

Supplement: supplementary_material [file attachment]

Task 2 Accuracy

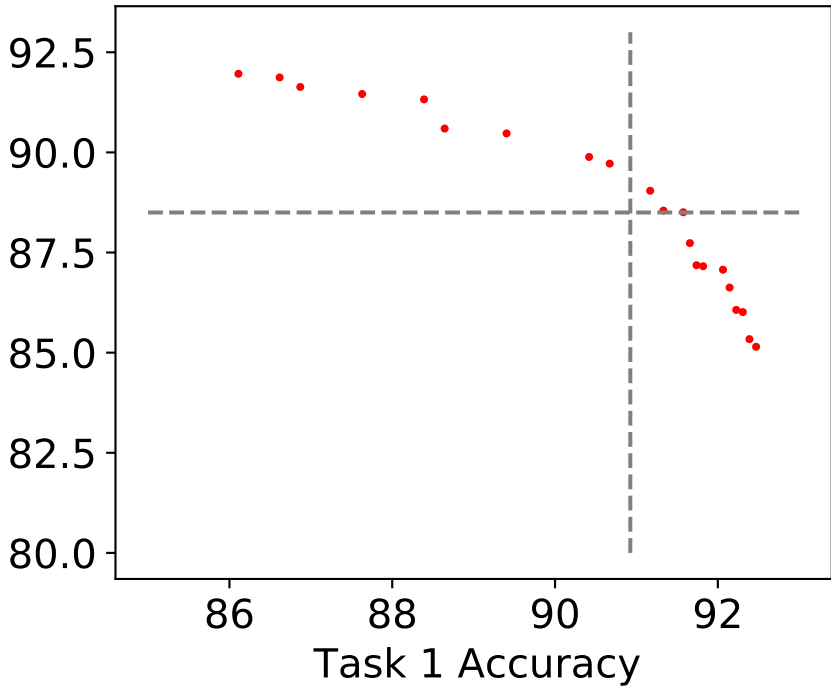

Supplement: supplementary_material [file attachment]
